# Supplementary material for: Basalt fibers coated with nano-calcium carbonate for in-tube solid-phase microextraction and online analysis of estrogens coupled with high-performance liquid chromatography
Source: Royal Society of Chemistry journal article supplement (doi:10.1039/c7ay02979a), 2018-01-01
Supplement: c7ay02979a1.pdf [file c7ay02979a1.pdf]

## Supplementary information

### Basalt fibers coated with nano-calcium carbonate for in-tube solid-phase microextraction and online analysis of estrogens coupled with high-performance liquid chromatography

Xiuqin Wang, Juanjuan Feng, Jiaqing Feng, Yu Tian, Chuannan Luo, Min Sun\*

*Key Laboratory of Chemical Sensing & Analysis in Universities of Shandong*

*(University of Jinan), School of Chemistry and Chemical Engineering, University of*

*Jinan, Jinan 250022, China*

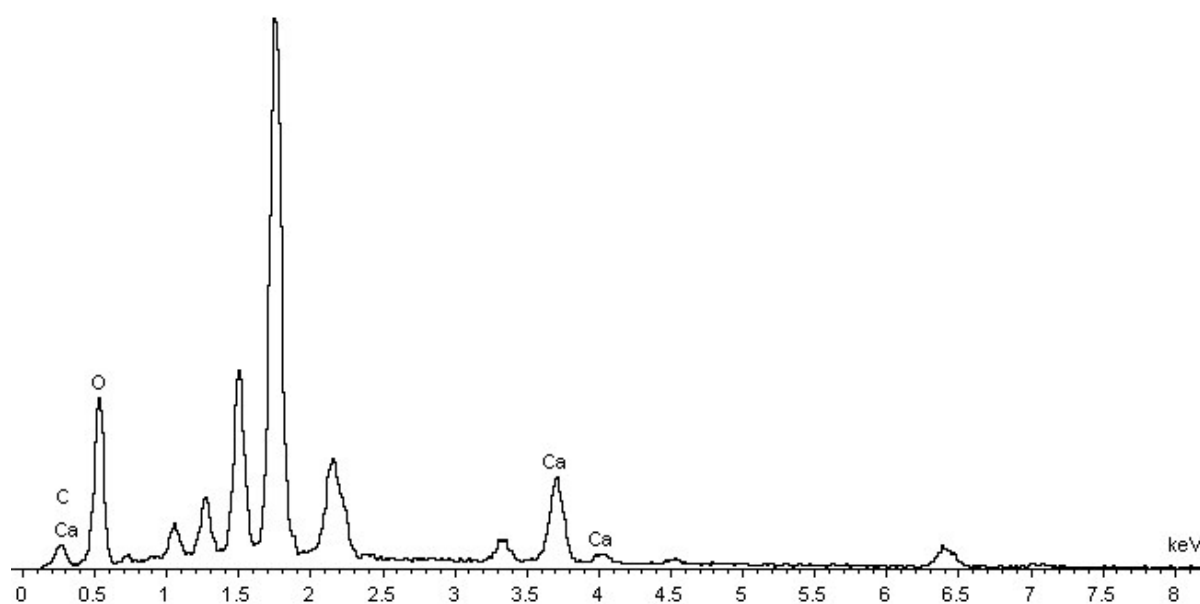

Fig. S1. The EDS image of nano- $\text{CaCO}_3$ .

---

\*Corresponding author. Tel: +86 531 89736065.  
E-mail address: [chm\\_sunm@ujn.edu.cn](mailto:chm_sunm@ujn.edu.cn)(M. Sun).
